# Supplementary material
Source: HighWire-hosted journal article supplement (https://ijgc.bmj.com/highwire/filestream/28356/field_highwire_adjunct_files/1/ijgc-2022-004026supp002_data_supplement.pdf)

# Supplemental Figure 2

**MSI, POLE, and POLD1 are better predictors of TMB than histology.** A multivariable model was constructed from all evaluable specimens in the database, evaluating the independent contributions to TMB levels.

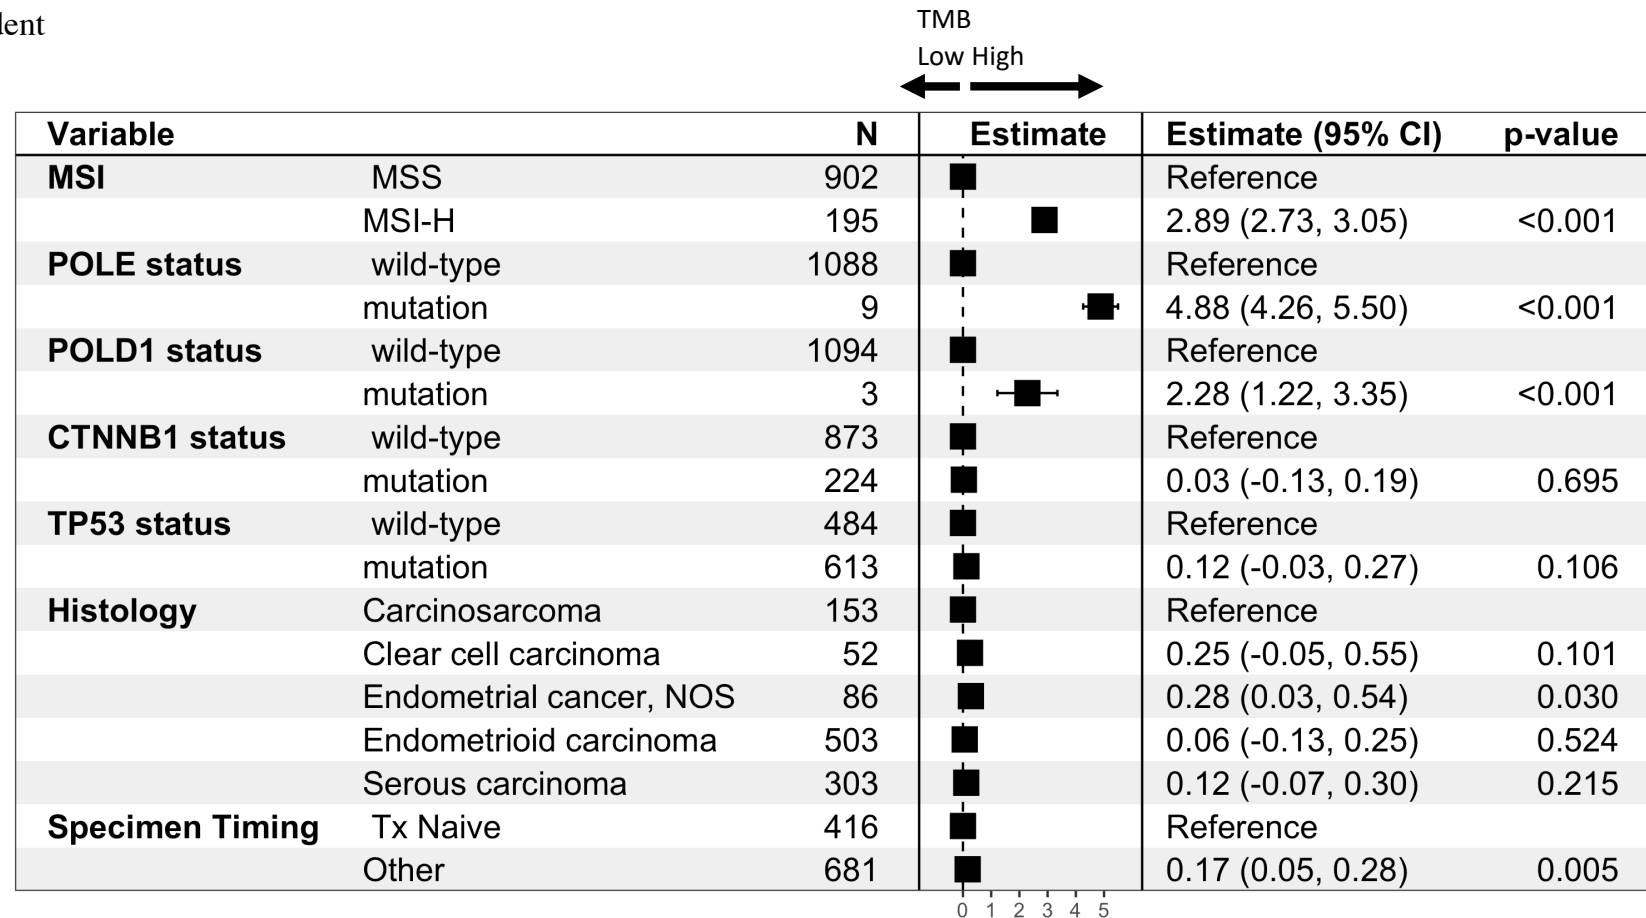

Supplement: ijgc-2022-004026supp002_data_supplement.pdf [file ijgc-2022-004026supp002_data_supplement.pdf]
